# Supplementary material
Source: MDPI journal article supplement (https://www.mdpi.com/2079-6412/9/9/589)
Supplement: s1 [file s1]

# Supplementary Materials: Influence of the Growth Ambience on the Localized Phase Separation and Electrical Conductivity in SrRuO<sub>3</sub> Oxide Films

Hsin-Ming Cheng

Organic Electronics Research Center and Department of Electronic Engineering, Ming Chi University of Technology, New Taipei City 24301, Taiwan; SMCheng@mail.mcut.edu.tw

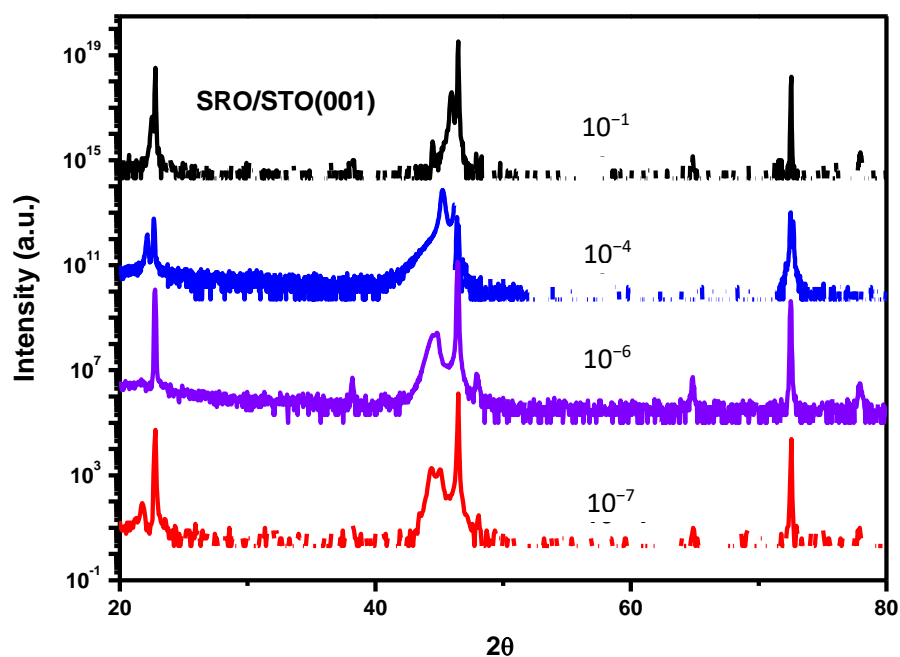

**Figure S1.** The growth ambience dependent XRD patterns around surface normal of SRO thin films on STO (001) deposited with the oxygen pressure of  $10^{-1}$ ,  $10^{-4}$ ,  $10^{-6}$ , and  $10^{-7}$  Torr, respectively.

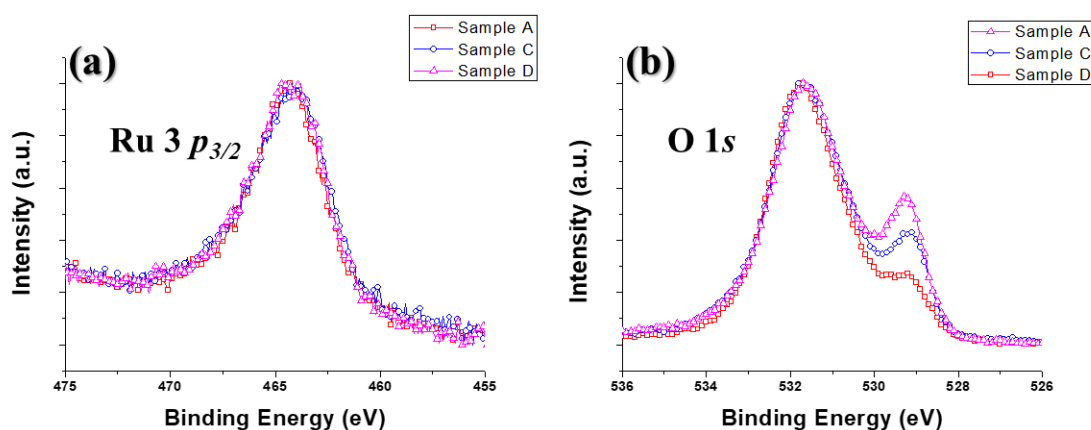

**Figure S2.** (a) and (b) are X-ray photoemission spectra of Ru 3p core-level and O 1s for SRO thin film samples, respectively.

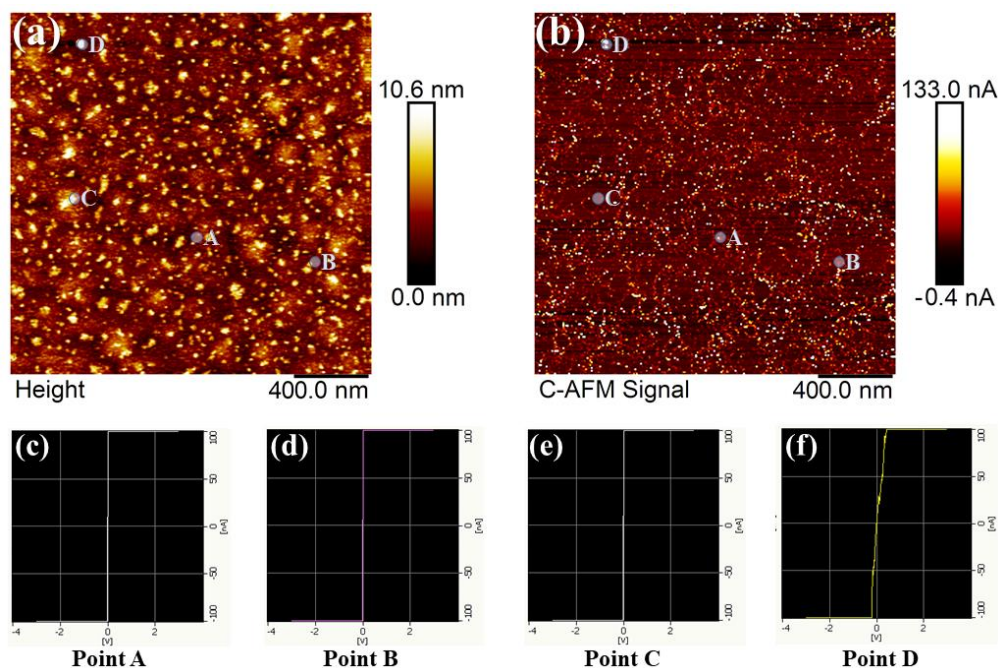

**Figure S3.** (a) and (b) The surface topography and the current mapping images for samples A, respectively. (c), (d), (e) and (f) The corresponding local I-V curves of region A, B, C, and D.

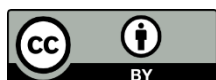

© 2019 by the authors. Submitted for possible open access publication under the terms and conditions of the Creative Commons Attribution (CC BY) license (<http://creativecommons.org/licenses/by/4.0/>).
